# Supplementary material
Source: Research Square preprint supplement (doi:10.21203/rs.3.rs-9833332/v1)
Supplement: Supplementary file 1 [file 3041ff282e1d90acef3e5337.docx]

**Appendix A**

**“What works, for whom”: Individual differences in presence, embodiment, and engagement, and their impact on Virtual Reality intervention effects.**

Aniek M. Siezenga1,2, Esther C. A. Mertens1,3, Tiffany Tettero1,2, and Jean-Louis van Gelder1,2

1 Max Planck Institute for the Study of Crime, Security and Law, Günterstalstraße 73, 79100 Freiburg im Breisgau, Germany

2 Department of Education and Child Studies, Leiden University, Wassenaarseweg 52, 2333AK, Leiden, The Netherlands

3 Netherlands Institute for the Study of Crime and Law Enforcement, De Boelelaan 1077, 1081HV, Amsterdam

Correspondence concerning this article should be addressed to J.-L. van Gelder,

j.vangelder@csl.mpg.de

**Table A1a.** Descriptive Statistics per group based on percentiles of Presence.

|  | P1 | P2 | P3 | P4 |
| --- | --- | --- | --- | --- |
|  | *M*(*SD*) | *M*(*SD*) | *M*(*SD*) | *M*(*SD*) |
| Session 1 | *n* = 24 | *n* = 50 | *n* = 16 | *n* = 16 |
| Vividness pre | 3.92(1.10) | 3.90(1.35) | 3.61(1.19) | 4.27(0.99) |
| Vividness post | 4.39(0.97) | 4.84(1.07) | 4.85(0.74) | 5.10(0.69) |
| Presence | 2.32(0.30) | 2.97(0.09) | 3.41(0.13) | 3.91(0.13) |
| Embodiment | 2.44(0.50) | 2.69(0.49) | 2.84(0.47) | 2.97(0.62) |
| Engagement | 2.79(0.27) | 2.98(0.30) | 3.29(0.19) | 3.30(0.27) |
| Session 2 | *n* = 24 | *n* = 57 | *n* = 8 | *n* = 15 |
| Vividness pre | 3.83(1.06) | 4.01(1.04) | 4.40(0.60) | 4.69(1.03) |
| Vividness post | 4.21(1.12) | 4.54(0.99) | 4.95(0.37) | 5.61(0.77) |
| Presence | 2.26(0.26) | 2.93(0.12) | 3.41(0.13) | 3.88(0.13) |
| Embodiment | 2.23(0.44) | 2.75(0.43) | 2.94(0.42) | 3.30(0.59) |
| Engagement | 2.82(0.30) | 3.06(0.24) | 3.46(0.21) | 3.54(0.28) |
| Session 3 | *n* = 21 | *n* = 59 | *n* = 14 | *n* = 10 |
| Vividness pre | 4.10(1.19) | 4.27(1.13) | 4.70(0.90) | 4.88(0.97) |
| Vividness post | 4.50(1.18) | 4.82(0.93) | 5.30(0.75) | 5.52(0.90) |
| Presence | 2.19(0.34) | 2.95(0.10) | 3.38(0.14) | 3.89(0.13) |
| Embodiment | 2.39(0.53) | 2.72(0.43) | 2.75(0.69) | 3.39(0.58) |
| Engagement | 2.88(0.34) | 3.10(0.23) | 3.42(0.17) | 3.63(0.19) |

*Note.* P1 = 0-16th percentile, P2 = 16-50th percentile, P3 = 50-84th percentile, P4 = 84-100th percentile.

**Table A1b.** Descriptive Statistics per group based on percentiles of Engagement.

|  | P1 | P2 | P3 | P4 |
| --- | --- | --- | --- | --- |
|  | *M*(*SD*) | *M*(*SD*) | *M*(*SD*) | *M*(*SD*) |
| Session 1 | *n* = 24 | *n* = 33 | *n* = 33 | *n* = 16 |
| Vividness pre | 3.92(1.10) | 3.90(1.35) | 3.61(1.19) | 4.26(0.99) |
| Vividness post | 4.39(0.97) | 4.84(1.07) | 4.85(0.74) | 5.10(0.69) |
| Presence | 2.32(0.30) | 2.97(0.09) | 3.41(0.13) | 3.91(0.13) |
| Embodiment | 2.44(0.50) | 2.69(0.49) | 2.84(0.47) | 2.97(0.62) |
| Engagement | 2.79(0.27) | 2.98(0.30) | 3.29(0.19) | 3.30(0.27) |
| Session 2 | *n* = 21 | *n* = 38 | *n* = 29 | *n* = 16 |
| Vividness pre | 3.77(1.17) | 3.92(1.07) | 4.19(1.05) | 4.33(0.84) |
| Vividness post | 4.12(1.45) | 4.46(1.05) | 4.77(0.86) | 4.93(0.64) |
| Presence | 2.40(0.39) | 2.79(0.31) | 2.97(0.51) | 3.34(0.43) |
| Embodiment | 2.19(0.52) | 2.71(0.30) | 2.67(0.48) | 3.09(0.69) |
| Engagement | 2.55(0.21) | 2.93(0.05) | 3.16(0.09) | 3.54(0.12) |
| Session 3 | *n* = 21 | *n* = 32 | *n* = 37 | *n* = 14 |
| Vividness pre | 4.28(1.35) | 4.13(1.06) | 4.11(1.04) | 4.64(1.03) |
| Vividness post | 4.57(1.48) | 4.65(0.81) | 4.61(1.04) | 5.29(0.88) |
| Presence | 2.29(0.46) | 2.64(0.43) | 2.92(0.45) | 3.41(0.58) |
| Embodiment | 2.08(0.70) | 2.66(0.36) | 2.64(0.47) | 3.07(0.57) |
| Engagement | 2.64(0.22) | 2.94(0.05) | 3.24(0.07) | 3.52(0.11) |

*Note.* P1 = 0-16th percentile, P2 = 16-50th percentile, P3 = 50-84th percentile, P4 = 84-100th percentile.

**Table A1c.** Descriptive Statistics per group based on percentiles of Embodiment.

|  | P1 | P2 | P3 | P4 |
| --- | --- | --- | --- | --- |
|  | *M*(*SD*) | *M*(*SD*) | *M*(*SD*) | *M*(*SD*) |
| Session 1 | *n* = 17 | *n* = 34 | *n* = 47 | *n* = 8 |
| Vividness pre | 3.98(1.33) | 3.56(1.05) | 4.06(1.27) | 4.48(1.19) |
| Vividness post | 4.67(1.25) | 4.59(0.97) | 4.92(0.86) | 5.00(0.96) |
| Presence | 2.75(0.57) | 2.94(0.54) | 3.10(0.45) | 3.59(0.42) |
| Embodiment | 1.79(0.36) | 2.50(0.00) | 3.00(0.00) | 3.69(0.26) |
| Engagement | 2.84(0.44) | 2.99(0.24) | 3.09(0.32) | 3.30(0.27) |
| Session 2 | *n* = 17 | *n* = 35 | *n* = 39 | *n* = 13 |
| Vividness pre | 3.80(1.27) | 3.96(0.96) | 4.10(0.99) | 4.86(0.81) |
| Vividness post | 4.41(1.32) | 4.56(0.93) | 4.57(0.96) | 5.46(0.91) |
| Presence | 2.50(0.57) | 2.77(0.41) | 3.09(0.36) | 3.58(0.46) |
| Embodiment | 1.82(0.25) | 2.50(0.00) | 3.00(0.00) | 3.69(0.25) |
| Engagement | 2.89(0.45) | 3.00(0.19) | 3.13(0.28) | 3.60(0.25) |
| Session 3 | *n* = 21 | *n* = 24 | *n* = 48 | *n* = 11 |
| Vividness pre | 3.76(1.29) | 4.13(1.04) | 4.56(0.99) | 5.04(1.07) |
| Vividness post | 4.33(1.28) | 4.69(0.83) | 4.95(0.93) | 5.87(0.85) |
| Presence | 2.44(0.69) | 2.59(0.38) | 3.04(0.47) | 3.77(0.31) |
| Embodiment | 1.83(0.29) | 2.50(0.00) | 3.00(0.00) | 3.82(0.25) |
| Engagement | 2.94(0.36) | 3.04(0.24) | 3.16(0.36) | 3.63(0.22) |

*Note.* The percentiles of Embodiment differ because there was too little variance to obtain separate groups based on the 16th, 50th, and 84th percentiles. Session 1: P1 = 0-16th percentile, P2 = 16-48th percentile, P3 = 48-84th percentile, P4 = 84-100th percentile. Session 2: P1 = 0-16th percentile, P2 = 16-49th percentile, P3 = 49-84th percentile, P4 = 84-100th percentile. Session 3: P1 = 0-16th percentile, P2 = 16-43th percentile, P3 = 43-84th percentile, P4 = 84-100th percentile.
