# Supplementary material
Source: Research Square preprint supplement (doi:10.21203/rs.3.rs-9833332/v1)

**Appendix B**

**“What works, for whom”: Individual differences in presence, embodiment, and engagement, and their impact on Virtual Reality intervention effects.**

Aniek M. Siezenga1,2, Esther C. A. Mertens1,3, Tiffany Tettero1,2, and Jean-Louis van Gelder1,2

1 Max Planck Institute for the Study of Crime, Security and Law, Günterstalstraße 73, 79100 Freiburg im Breisgau, Germany

2 Department of Education and Child Studies, Leiden University, Wassenaarseweg 52, 2333AK, Leiden, The Netherlands

3 Netherlands Institute for the Study of Crime and Law Enforcement, De Boelelaan 1077, 1081HV, Amsterdam

Correspondence concerning this article should be addressed to J.-L. van Gelder,

j.vangelder@csl.mpg.de

**Overview statistics sensitivity analyses**

The moderation analyses were re-run excluding participants that experienced technological problems during one or more VR sessions (*n* = 15; e.g., distorted sounds, non-functioning controller). In general, the patterns for the main effects of presence, embodiment, and engagement were similar, showing positive main effects of presence and engagement and negative main effects of embodiment on post-session vividness. Specifically, a significant main effect of presence occurred during VR session 2 (*b* = 0.56, *t*(83) = 3.24, *p* = .002, Cohen’s *f* = .30). Significant main effects of embodiment appeared during VR session 2 (*b* = -0.39, *t*(83) = -2.59, *p* = .011, Cohen’s *f* = .21). Last, a significant main effect of engagement was found during VR session 1 (*b* = 0.79, *t*(85) = 2.75, *p* = .007, Cohen’s *f* = .28).

In contrast to the main analyses, no significant moderators were observed, except for a trend towards a significant moderator of engagement during VR session 1 (*b* = -0.38, *t*(85) = -1.87, *p* = .065, Cohen’s *f2* = -.17). As shown in Figure S1, change in vividness over time was least strong for the participants with the lowest levels of engagement.

*Figure S1:* Plot of the trend towards a moderation effect of engagement in VR session 1.


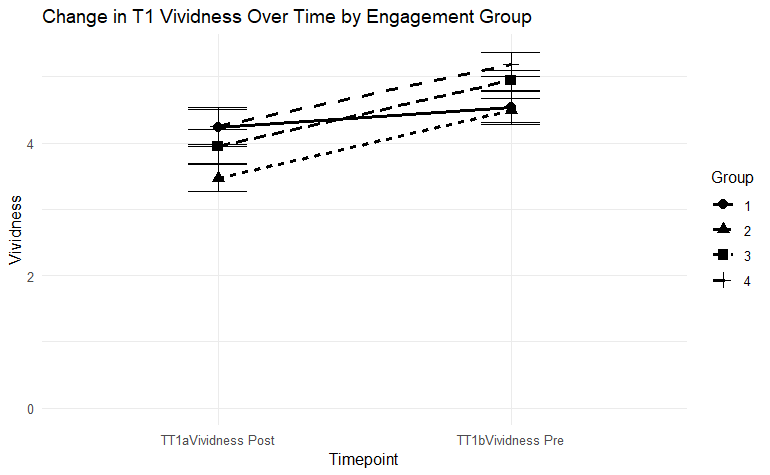

Supplement: Supplementary file 2 [file 5191b4eaeaddda46160269a6.docx]
