# Supplementary material
Source: Research Square preprint supplement (doi:10.21203/rs.3.rs-9833332/v1)
Supplement: Supplementary file 4 [file 883e187066c8f83214dddf7b.docx]

**Appendix C**

**“What works, for whom”: Individual differences in presence, embodiment, and engagement, and their impact on Virtual Reality intervention effects.**

Aniek M. Siezenga1,2, Esther C. A. Mertens1,3, Tiffany Tettero1,2, and Jean-Louis van Gelder1,2

1 Max Planck Institute for the Study of Crime, Security and Law, Günterstalstraße 73, 79100 Freiburg im Breisgau, Germany

2 Department of Education and Child Studies, Leiden University, Wassenaarseweg 52, 2333AK, Leiden, The Netherlands

3 Netherlands Institute for the Study of Crime and Law Enforcement, De Boelelaan 1077, 1081HV, Amsterdam

Correspondence concerning this article should be addressed to J.-L. van Gelder,

j.vangelder@csl.mpg.de

**Table A2a.** Standardized factor loadings (λ) of the general and specific factors of Presence.

|  | λ(*SE*) | *z*-value |
| --- | --- | --- |
| General factor |  |  |
| T1 Item1 | .652(0.065) | 10.07*** |
| T1 Item2 | .692(0.067) | 10.32*** |
| T1 Item3 | .853(0.037) | 23.32*** |
| T1 Item4 | .792(0.042) | 19.07*** |
| T2 Item1 | .771(0.047) | 16.57*** |
| T2 Item2 | .786(0.057) | 13.67*** |
| T2 Item3 | .884(0.034) | 25.98*** |
| T2 Item4 | .880(0.031) | 28.54*** |
| T3 Item1 | .875(0.036) | 24.47*** |
| T3 Item2 | .829(0.052) | 15.86*** |
| T3 Item3 | .831(0.037) | 22.56*** |
| T3 Item4 | .857(0.033) | 26.11*** |
| Specific factor 1 |  |  |
| T1 Item1 | .589(0.091) | 6.47*** |
| T1 Item2 | .719(0.093) | 7.71*** |
| T1 Item3 | .387(0.083) | 4.65*** |
| T1 Item4 | .309(0.073) | 4.21*** |
| Specific factor 2 |  |  |
| T2 Item1 | .482(0.213) | 2.26** |
| T2 Item2 | .599(0.266) | 2.25** |
| T2 Item3 | .070(0.108) | 0.64 |
| T2 Item4 | -.063(0.092) | -0.69 |
| Specific factor 3 |  |  |
| T3 Item1 | .456(0.142) | 3.21** |
| T3 Item2 | .192(0.136) | 1.41 |
| T3 Item3 | .143(0.085) | 1.69* |
| T3 Item4 | .305(0.121) | 2.51** |

*** = <.001

** = < .05

* = < .10

**Table A2b.** Standardized factor loadings (λ) of the general and specific factors of Engagement.

|  | λ(*SE*) | *z*-value |  | λ(*SE*) | *z*-value |
| --- | --- | --- | --- | --- | --- |
| General factor |  |  | Specific factor 1 |  |  |
| T1 Item1 | .434(0.07) | 6.21*** | T1 Item1 | .175(0.10) | 1.85* |
| T1 Item2 | .528(0.07) | 8.08*** | T1 Item2 | .135(0.09) | 1.44 |
| T1 Item3 | .664(0.05) | 12.68*** | T1 Item3 | .322(0.07) | 4.33*** |
| T1 Item4 | .464(0.09) | 5.44*** | T1 Item4 | .074(0.08) | 0.94 |
| T1 Item5 | .350(0.07) | 4.84*** | T1 Item5 | .083(0.09) | 0.98 |
| T1 Item6 | .245(0.09) | 2.65*** | T1 Item6 | .183(0.09) | 2.06** |
| T1 Item7 | .565(0.06) | 9.12*** | T1 Item7 | .218(0.08) | 2.90** |
| T1 Item8 | .623(0.05) | 12.21*** | T1 Item8 | -.272(0.10) | -2.76** |
| T1 Item9 | .736(0.04) | 17.03*** | T1 Item9 | -.184(0.09) | -2.15** |
| T1 Item10 | .584(0.06) | 10.42*** | T1 Item10 | .650(0.06) | 11.13*** |
| T1 Item11 | .548(0.06) | 9.00*** | T1 Item11 | .713(0.05) | 13.34*** |
| T1 Item12 | .663(0.06) | 10.34*** | T1 Item12 | .477(0.08) | 6.07*** |
| T1 Item13 | .717(0.05) | 13.20*** | T1 Item13 | .676(0.06) | 11.32*** |
| T1 Item14 | .665(0.06) | 11.28*** | T1 Item14 | .637(0.06) | 10.06*** |
| T2 Item1 | .574(0.06) | 10.16*** | Specific factor 2 |  |  |
| T2 Item2 | .800(0.04) | 18.15*** | T2 Item1 | -.152(0.10) | -1.60 |
| T2 Item3 | .850(0.04) | 23.05*** | T2 Item2 | -.129(0.08) | -1.53 |
| T2 Item4 | .599(0.06) | 10.51*** | T2 Item3 | -.054(0.08) | -0.71 |
| T2 Item5 | .321(0.07) | 4.53*** | T2 Item4 | .592(0.06) | 9.59*** |
| T2 Item6 | .377(0.08) | 4.87*** | T2 Item5 | .664(0.06) | 10.34*** |
| T2 Item7 | .857(0.04) | 19.87*** | T2 Item6 | .479(0.07) | 6.65*** |
| T2 Item8 | .756(0.05) | 16.47*** | T2 Item7 | -.120(0.08) | -1.55 |
| T2 Item9 | .779(0.05) | 16.02*** | T2 Item8 | -.580(0.08) | -7.04*** |
| T2 Item10 | .829(0.04) | 18.72*** | T2 Item9 | -.533(0.08) | -6.76*** |
| T2 Item11 | .908(0.03) | 29.42*** | T2 Item10 | .106(0.07) | 1.46 |
| T2 Item12 | .832(0.04) | 21.23*** | T2 Item11 | .205(0.06) | 3.23** |
| T2 Item13 | .831(0.05) | 18.64*** | T2 Item12 | .129(0.06) | 2.09** |
| T2 Item14 | .804(0.05) | 16.33*** | T2 Item13 | .427(0.07) | 5.79*** |
| T3 Item1 | .562(0.06) | 8.89*** | T2 Item14 | .436(0.07) | 6.27*** |
| T3 Item2 | .721(0.06) | 13.12*** | Specific factor 3 |  |  |
| T3 Item3 | .756(0.04) | 17.73*** | T3 Item1 | .057(0.07) | 0.86 |
| T3 Item4 | .461(0.07) | 7.13*** | T3 Item2 | .253(0.07) | 3.55*** |
| T3 Item5 | .286(0.07) | 3.96*** | T3 Item3 | .331(0.06) | 5.80*** |
| T3 Item6 | .386(0.06) | 6.10*** | T3 Item4 | .811(0.04) | 20.42*** |
| T3 Item7 | .770(0.04) | 19.29*** | T3 Item5 | .713(0.05) | 14.64*** |
| T3 Item8 | .805(0.04) | 22.40*** | T3 Item6 | .431(0.06) | 7.90*** |
| T3 Item9 | .742(0.04) | 19.66*** | T3 Item7 | -.306(0.06) | -5.61*** |
| T3 Item10 | .850(0.04) | 23.66*** | T3 Item8 | -.540(0.05) | -10.36*** |
| T3 Item11 | .797(0.04) | 18.73*** | T3 Item9 | -.554(0.04) | -12.62*** |
| T3 Item12 | .774(0.04) | 19.17*** | T3 Item10 | .470(0.05) | 8.70*** |
| T3 Item13 | .816(0.04) | 21.75*** | T3 Item11 | .542(0.06) | 9.77*** |
| T3 Item14 | .802(0.04) | 19.32*** | T3 Item12 | .254(0.06) | 4.11*** |
|  |  |  | T3 Item13 | .476(0.06) | 8.14*** |
|  |  |  | T3 Item14 | .497(0.05) | 9.90*** |

*** = <.001; ** = < .05; * = < .10
